# Supplementary material
Source: Springer Nature journal article supplement (https://www.springermedizin.de/resource/supplementary/13075_2012_3589_MOESM3_ESM.pdf/9694872)

**A**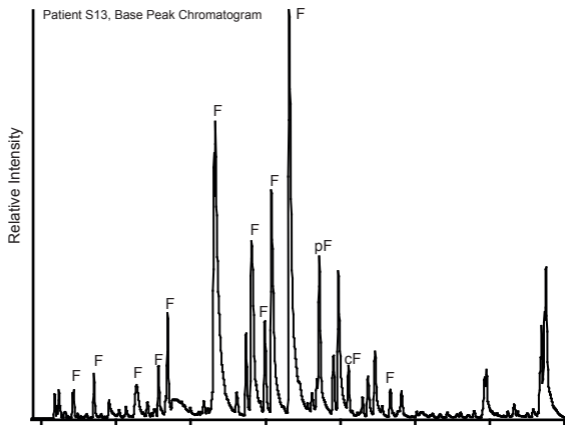**B**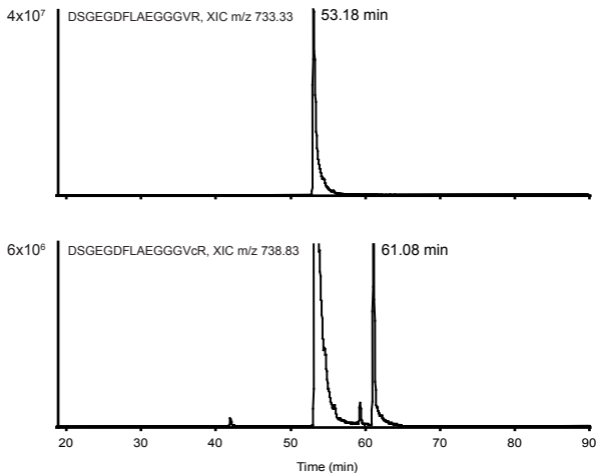

Supplement: MOESM3 [file 9694872]
